# Supplementary material for: Beekeeping Management Practices Are Associated with Operation Size and Beekeepers’ Philosophy towards in-Hive Chemicals
Source: PubMed Central journal article supplement (PMC6359672; doi:10.3390/insects10010010), 2019-01-08
Supplement: insects-10-00010-s001.pdf [file insects-10-00010-s001.pdf]

**Table S1.** Numerical results of the multiple factor analysis for the supplementary variables of the full dataset. Values indicate the effect size of each variable for dimensions 1 and 2. Values greater than 2 for the v.test indicate significant differences between the centroid of each group and zero. This table is comparable to Table 2 in the manuscript.

|                       |              | Dimension 1 | v.test | Dimension 2 | v.test  |
|-----------------------|--------------|-------------|--------|-------------|---------|
| Beekeeping Philosophy | Natural      | -1.194      | -7.317 | 0.557       | 4.299   |
|                       | Organic      | -0.531      | 10.806 | -0.006      | -0.144  |
|                       | Conventional | 0.185       | 13.033 | -0.016      | -1.405  |
| Operation Size        | Backyard     | -0.080      | 15.128 | -0.087      | -20.746 |
|                       | Sideliners   | 1.733       | 11.603 | 1.636       | 13.785  |
|                       | Commercial   | 2.126       | 9.587  | 2.865       | 16.256  |

**Table S2.** Summary of the first 10 eigenvalues of the multiple factor analysis (MFA) of the subset of data.

|            | Dim.1 | Dim.2 | Dim.3 | Dim.4 | Dim.5 | Dim.6 | Dim.7 | Dim.8 | Dim.9 | Dim.10 |
|------------|-------|-------|-------|-------|-------|-------|-------|-------|-------|--------|
| Variance   | 2.14  | 1.20  | 0.97  | 0.91  | 0.86  | 0.80  | 0.75  | 0.71  | 0.68  | 0.65   |
| % Variance | 13.7  | 7.6   | 6.2   | 5.8   | 5.5   | 5.1   | 4.8   | 4.6   | 4.4   | 4.1    |
| Cumulative | 13.7  | 21.3  | 27.5  | 33.3  | 38.8  | 43.9  | 48.7  | 53.3  | 57.6  | 61.8   |

**Table S3.** Pairwise RV coefficients between groups of variables used in the multiple factor analysis (MFA) of the subset of data.

|                | Philosophy | Operation Size | Chemicals | Feeding | Manipulation | Goals | MFA   |
|----------------|------------|----------------|-----------|---------|--------------|-------|-------|
| Philosophy     | 1.000      | 0.104          | 0.258     | 0.083   | 0.108        | 0.265 | 0.291 |
| Operation Size | 0.104      | 1.000          | 0.177     | 0.032   | 0.086        | 0.028 | 0.144 |
| Chemicals      | 0.258      | 0.177          | 1.000     | 0.114   | 0.125        | 0.094 | 0.532 |
| Feeding        | 0.083      | 0.032          | 0.114     | 1.000   | 0.041        | 0.036 | 0.464 |
| Manipulation   | 0.108      | 0.086          | 0.125     | 0.041   | 1.000        | 0.071 | 0.728 |
| Goals          | 0.265      | 0.028          | 0.094     | 0.036   | 0.071        | 1.000 | 0.446 |
| MFA            | 0.291      | 0.144          | 0.532     | 0.464   | 0.728        | 0.446 | 1.000 |
